# Supplementary material for: Parallel Propagation of Toxoplasma gondii In Vivo, In Vitro and in Alternate Model: Towards Less Dependence on the Mice Model
Source: MDPI journal article supplement (doi:10.3390/pathogens11091038), 2022-09-13
Supplement: s1 [file s1]

**Table S1.** ToxoDB-based ID of the loci analysed in the present study, based on the annotations of frequently used *T. gondii* reference strains.

| <b>STRAIN</b> \ <b>LOCI</b> | <b>Sag2</b>    | <b>CB21-4</b> | <b>PK1</b>   | <b>L363</b>    | <b>SAG1</b>    | <b>GRA6</b> | <b>SAG3</b>   | <b>M102</b>    |
|-----------------------------|----------------|---------------|--------------|----------------|----------------|-------------|---------------|----------------|
| GT1                         | TGGT1_chrVIII  | TGGT1_chrIII  | TGGT1_chrVI  | TGGT1_chrVIIb  | TGGT1_chrVIII  | TGGT1_chrX  | TGGT1_chrXII  | TGGT1_chrVIIa  |
| ME49                        | TGME49_chrVIII | TGME49_chrIII | TGME49_chrVI | TGME49_chrVIIb | TGME49_chrVIII | TGME49_chrX | TGME49_chrXII | TGME49_chrVIIa |
| VEG                         | TGVEG_chrVIII  | TGVEG_chrIII  | TGVEG_chrVI  | TGVEG_chrVIIb  | TGVEG_chrVIII  | TGVEG_chrX  | TGVEG_chrXII  | TGVEG_chrVIIa  |

\* The ID information for the *T. gondii* RH strain is lacking for several genes.

**Table S2.** BioProject PRJEB34235 European Nucleotide Archive (ENA) accession numbers.

| <b>SAMPLE ID</b> | <b>ENA</b> | <b>BioProject</b> | <b>READS ENA ACCESSION</b> |
|------------------|------------|-------------------|----------------------------|
| Tg_RH_1_A        |            | PRJEB34235        | ERR3505173                 |
| Tg_RH_2_A        |            | PRJEB34235        | ERR3505211                 |
| Tg_RH_3_A        |            | PRJEB34235        | ERR3505219                 |
| Tg_RH_4_A        |            | PRJEB34235        | ERR3505218                 |
| Tg_RH_5_A        |            | PRJEB34235        | ERR3505214                 |
| Tg_RH_6_A        |            | PRJEB34235        | ERR3505175                 |
| Tg_RH_7_A        |            | PRJEB34235        | ERR3505196                 |
| Tg_RH_8_A        |            | PRJEB34235        | ERR3505188                 |
| Tg_RH_9_A        |            | PRJEB34235        | ERR3505191                 |
| Tg_RH_10_A       |            | PRJEB34235        | ERR3505210                 |
| Tg_RH_11_A       |            | PRJEB34235        | ERR3505195                 |
| Tg_RH_12_A       |            | PRJEB34235        | ERR3505202                 |
| Tg_RH_13_A       |            | PRJEB34235        | ERR3505183                 |
| Tg_RH_14_A       |            | PRJEB34235        | ERR3505208                 |
| Tg_RH_15_A       |            | PRJEB34235        | ERR3505201                 |
| Tg_RH_16_A       |            | PRJEB34235        | ERR3505162                 |
| Tg_RH_17_A       |            | PRJEB34235        | ERR3505161                 |
| Tg_RH_18_A       |            | PRJEB34235        | ERR3505169                 |

|             |            |            |
|-------------|------------|------------|
| Tg_RH_19_A  | PRJEB34235 | ERR3505213 |
| Tg_RH_20_A  | PRJEB34235 | ERR3505174 |
| Tg_RH_21_A  | PRJEB34235 | ERR3505198 |
| Tg_RH_22_A  | PRJEB34235 | ERR3505160 |
| Tg_RH_23_A  | PRJEB34235 | ERR3505178 |
| Tg_RH_24_A  | PRJEB34235 | ERR3505205 |
| Tg_RH_25_A  | PRJEB34235 | ERR3505204 |
| Tg_RH_27_A  | PRJEB34235 | ERR3505171 |
| Tg_RH_28_A  | PRJEB34235 | ERR3505212 |
| Tg_RH_30_A  | PRJEB34235 | ERR3505203 |
| Tg_RH_31_A  | PRJEB34235 | ERR3505159 |
| Tg_RH_32_A  | PRJEB34235 | ERR3505166 |
| Tg_RH_1_NA  | PRJEB34235 | ERR3505163 |
| Tg_RH_2_NA  | PRJEB34235 | ERR3505189 |
| Tg_RH_3_NA  | PRJEB34235 | ERR3505179 |
| Tg_RH_4_NA  | PRJEB34235 | ERR3505206 |
| Tg_RH_5_NA  | PRJEB34235 | ERR3505168 |
| Tg_RH_6_NA  | PRJEB34235 | ERR3505190 |
| Tg_RH_7_NA  | PRJEB34235 | ERR3505164 |
| Tg_RH_8_NA  | PRJEB34235 | ERR3505172 |
| Tg_RH_9_NA  | PRJEB34235 | ERR3505167 |
| Tg_RH_10_NA | PRJEB34235 | ERR3505184 |
| Tg_RH_11_NA | PRJEB34235 | ERR3505182 |
| Tg_RH_12_NA | PRJEB34235 | ERR3505197 |
| Tg_RH_13_NA | PRJEB34235 | ERR3505170 |
| Tg_RH_14_NA | PRJEB34235 | ERR3505165 |
| Tg_RH_15_NA | PRJEB34235 | ERR3505199 |
| Tg_RH_16_NA | PRJEB34235 | ERR3505216 |
| Tg_RH_17_NA | PRJEB34235 | ERR3505215 |
| Tg_RH_18_NA | PRJEB34235 | ERR3505193 |
| Tg_RH_19_NA | PRJEB34235 | ERR3505186 |
| Tg_RH_20_NA | PRJEB34235 | ERR3505177 |
| Tg_RH_21_NA | PRJEB34235 | ERR3505209 |
| Tg_RH_22_NA | PRJEB34235 | ERR3505185 |

|               |            |            |
|---------------|------------|------------|
| Tg_RH_23_NA   | PRJEB34235 | ERR3505194 |
| Tg_RH_24_NA   | PRJEB34235 | ERR3505192 |
| Tg_RH_25_NA   | PRJEB34235 | ERR3505180 |
| Tg_RH_26_NA   | PRJEB34235 | ERR3505176 |
| Tg_RH_27_NA   | PRJEB34235 | ERR3505181 |
| Tg_RH_28_NA   | PRJEB34235 | ERR3505187 |
| Tg_RH_30_NA   | PRJEB34235 | ERR3505217 |
| Tg_RH_31_NA * | PRJEB34235 | ERR3505200 |
| Tg_RH_32_NA * | PRJEB34235 | ERR3505207 |

---

\* RH positive controls
